# Supplementary material for: Halogen- and hydrogen-bonded self-assembled fibrillar networks of substituted 1,3:2,4-dibenzylidene-d-sorbitols (DBS)
Source: Royal Society of Chemistry journal article supplement (doi:10.1039/d3nr03988a), 2023-01-01
Supplement: d3nr03988a1.pdf [file d3nr03988a1.pdf]

## Supplemental Information for Halogen- and Hydrogen-bonded Self-Assembled Fibrillar Networks of Substituted 1,3:2,4-Dibenzylidene-d-sorbitols (DBS)

Bai, Y.,<sup>a</sup> Auzanneau, F.-I.,<sup>b</sup> Nasr, P.,<sup>a</sup> King, G.,<sup>c</sup> Reid, J.W.,<sup>c</sup> Leontowich, A.F.G.,<sup>c</sup> Corradini, M.G.,<sup>a,d</sup> Weiss, R.G.,<sup>e</sup> Rogers, M.A.<sup>a\*</sup>

### List of General Abbreviations

|                     |                                                               |
|---------------------|---------------------------------------------------------------|
| aq.                 | Aqueous                                                       |
| °C                  | degrees Celsius                                               |
| <sup>13</sup> C NMR | Carbon Nuclear Magnetic Resonance Spectroscopy                |
| COSY                | Proton-Proton Correlation Spectroscopy                        |
| δ <sub>C</sub>      | Chemical Shift                                                |
| equiv               | Equivalents                                                   |
| g                   | Grams                                                         |
| h                   | Hours                                                         |
| <sup>1</sup> H NMR  | Proton Nuclear Magnetic Resonance Spectroscopy                |
| HRESIMS             | High-Resolution Electrospray Ionization Mass Spectroscopy     |
| <i>J</i>            | Coupling constant                                             |
| JMOD                | J-Modulated Spin-Echo Nuclear Magnetic Resonance Spectroscopy |
| mg                  | Milligrams                                                    |
| MHz                 | Megahertz                                                     |
| min                 | Minutes                                                       |
| ml                  | Milliliters                                                   |
| mmol                | Millimoles                                                    |
| NMR                 | Nuclear Magnetic Resonance Spectroscopy                       |
| RT                  | Room Temperature                                              |
| sat                 | Saturated                                                     |
| TLC                 | Thin-Layer Chromatography                                     |
| TOF                 | Time of Flight                                                |
| μl                  | Microliters                                                   |

### List of Chemical Abbreviations

|      |                                  |
|------|----------------------------------|
| ACN  | acetonitrile                     |
| DBS  | 1,3:2,4-dibenzylidene-D-sorbitol |
| DCM  | dichloromethane                  |
| DMF  | N, N-dimethylformamide           |
| EtOH | ethanol                          |
| MeOH | methanol                         |
| pyr  | pyridine                         |
| tpp  | triphenylphosphine               |

## Synthesis of DBS Derivatives

Reactions were performed using oven-dried glassware under dry nitrogen atmospheres with solvents dried over phosphorous pentoxide for dichloromethane and sodium for tetrahydrofuran before distillation. All other reagents from commercial suppliers are used as received. 1,3:2,4-Dibenzylidene-D-sorbitol (DBS) (BOC Sciences, New York, USA) was used as the precursor to synthesize 6-iodo-1,3:2,4-dibenzylidene-D-sorbitol (6-I-DBS), 6-bromo-1,3:2,4-dibenzylidene-D-sorbitol (6-Br-DBS), and 6-chloro-1,3:2,4-dibenzylidene-D-sorbitol (6-Cl-DBS). Chemicals required for synthesis included acetonitrile ( $\geq 99\%$ ), dichloromethane ( $\geq 99.5\%$ ) and methanol ( $\geq 99.5\%$ ), from Fisher Scientific (ON, Canada), triphenylphosphine, imidazole, iodine, carbon tetrabromide and carbon tetrachloride, from Sigma-Aldrich (ON, CAN); and ethyl alcohol (95%) from Commercial Alcohols (ON, CAN).

$^1\text{H}$  NMR (400.13 MHz) and  $^{13}\text{C}$  NMR (100.6 MHz) spectra were recorded on a Bruker Avance spectrometer in  $\text{CDCl}_3$  (internal standard, for  $^1\text{H}$ , residual  $\text{CHCl}_3$   $\delta$  7.24; for  $^{13}\text{C}$   $\text{CDCl}_3$   $\delta$  77.0), or  $\text{DMSO-}d_6$  (internal standard, for  $^1\text{H}$  residual  $\text{CD}_2\text{HSOCD}_3$   $\delta$  2.49; for  $^{13}\text{C}$   $\text{DMSO-}d_6$   $\delta$  39.0). Chemical shifts (ppm) and coupling constants (J, Hz) were obtained from first-order analyses of 1D spectra and assignments of proton and carbon resonances were based on 2D  $^1\text{H-}^1\text{H}$  and  $^{13}\text{C-}^1\text{H}$  correlation experiments (Supplemental Figures S1-S12). Abbreviations for  $^1\text{H}$  NMR data: singlet (s), doublet (d), triplet (t), doublet of doublets (dd), triplet of doublets (td) and multiplet (m). TLC was performed on aluminum plates, precoated with silica gel 60 (250  $\mu\text{m}$ ) containing a fluorescent indicator; they were visualized under a UV lamp at 254 nm and were charred with a 10% solution of  $\text{H}_2\text{SO}_4$  in EtOH. Compounds were purified by flash chromatography on Silica Gel 60 (230-400 mesh) (SiliCycle, QC, CA) and optical rotations were measured at 23  $^\circ\text{C}$ , on an Autopol III polarimeter (Rudolph Research, NJ, USA) and are reported as  $[\alpha]_D$  (c in grams per 100 mL, solvent). Mass spectra were obtained under electrospray ionization (ESI) on a high-resolution mass spectrometer equipped with a TOF or an Orbitrap analyzer.

## Synthesis of 1,3:2,4-dibenzylidene-6-iodo-D-sorbitol

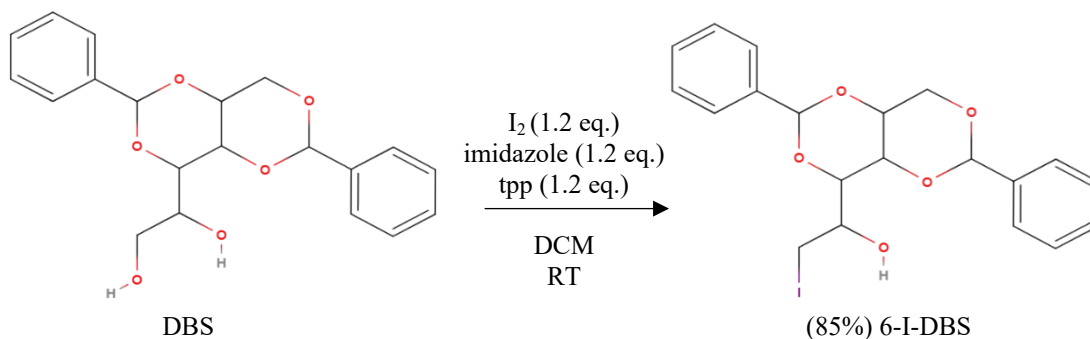

To a mixture of iodine (850 mg, 1.2 equiv), imidazole (228 mg, 1.2 equiv) and triphenylphosphine (878 mg, 1.2 equiv) in DCM (30 ml) was added DBS (1g, 2.79 mmol) at RT. The reaction was sealed under a nitrogen atmosphere and stirred vigorously for 5 hr at RT. Progress of the reaction was followed by TLC (1:50 MeOH/DCM). The crude product, obtained, was washed with EtOH (3 x 35 ml), filtered and concentrated by removing solvent on a rotary evaporator. 1,3:2,4-Dibenzylidene-6-iodo-D-sorbitol (6-I-DBS) was obtained in a white solid in a yield of 85% (1.1 g, 2.37 mmol).

$[\alpha]^{22}_{\text{D}} = +27.83$  (c 1.0, CH<sub>3</sub>CN). <sup>1</sup>H NMR (DMSO, 400 MHz, 298 K) (Figure S1)  $\delta_{\text{H}}$ : 7.4-7.5 and 7.3-7.4 (2m, 4H and 6H, aromatics), 5.6 (d, 2H, 2CHPh), 5.5 (d, 1H, OH), 4.1 (m, 3H, H-1a, H-1b, H-3), 3.9 (d, 1H, H-2), 3.7 (dd, 1H,  $J = 1.46, 8.73$  Hz, H-4), 3.5 (m, 1H, H-5), 3.4 (m, 2H, H-6a, H-6b). <sup>13</sup>C NMR (DMSO, 100 MHz, 298 K) (Figure S2)  $\delta_{\text{C}}$ : 139.0, 138.6, 129.1, 129.0, 128.5, 128.4, 126.6, 126.5 (aromatics), 99.8 (2CHPh), 81.0 (C-4), 70.3 (C-2), 69.6 (C-1), 68.5 (C-3), 65.3 (C-5), 16.3 (C-6). HR-MS (ESI):  $m/z$  calculated for C<sub>20</sub>H<sub>21</sub>O<sub>5</sub>I [M]<sup>+</sup> = 469.05064, found = 469.05040.

## Synthesis of 6-bromo-1,3:2,4-dibenzylidene-D-sorbitol

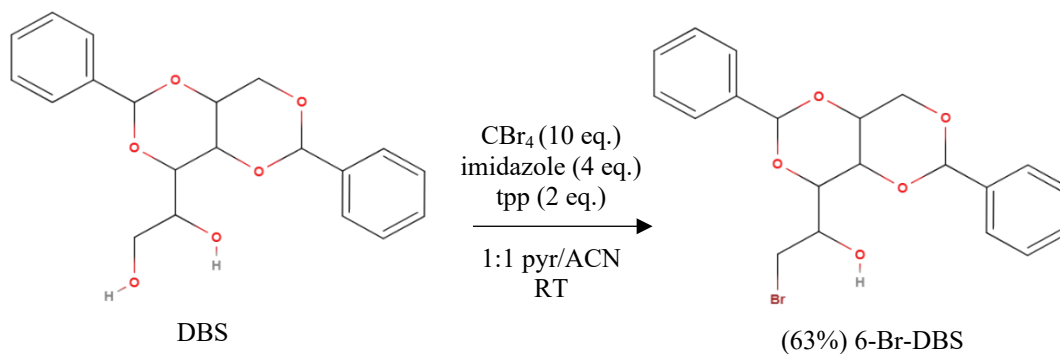

DBS (1g, 2.79 mmol) was added to a mixture of carbon tetrabromide (9.3 g, 10 equiv), imidazole (763 mg, 4 equiv) and triphenylphosphine (1.5 g, 2 equiv) in 1:1 pyridine/acetonitrile (20 ml) at RT. The reaction mixture was sealed under a nitrogen atmosphere and stirred vigorously for 5 hr at RT. Progress of the reaction was followed by TLC (1:50 MeOH/DCM) and quenched by adding MeOH (250  $\mu\text{l}$ ) and stirring for 10 min. The reaction mixture was diluted with toluene (6 x 50 ml), reduced to residue on a rotary evaporator and dried under vacuum. The residue, 6-bromo-1,3:2,4-dibenzylidene-D-sorbitol (6-Br-DBS), was passed twice a through a silica column using (1:50 MeOH/DCM) to yield 63% (738 mg, 1.75 mmol) of product.

$[\alpha]_D^{22} = +29.13$  (c 1.0,  $\text{CH}_3\text{CN}$ ).  $^1\text{H NMR}$  ( $\text{CD}_3\text{OD}$ , 400 MHz, 298 K) (Figure S5)  $\delta_{\text{H}}$ : 7.51-7.59 and 7.3-7.4 (2m, 4H and 6H, aromatics), 5.6 (d, 2H, 2CHPh), 4.4 (dd, 1H,  $J = 1.4, 12.6$  Hz, H-1a), 4.2 (m, 1H, H-5), 4.1 (m, 2H, H-1b, H-3), 3.9 (dd, 1H,  $J = 1.9, 8.5$  Hz, H-4), 3.8 (m, 1H, H-2), 3.7 (m, 2H, H-6a, H-6b), 2.3 (d, 1H, OH).  $^{13}\text{C NMR}$  ( $\text{CD}_3\text{OD}$ , 100 MHz, 298 K) (Figure S6)  $\delta_{\text{C}}$ : 137.8, 137.5, 129.16, 129.10, 128.26, 128.23, 126.46, 126.41 (aromatics), 100.9, 100.8 (2CHPh), 78.9 (C-4), 70.3 (C-2), 70.0 (C-1), 68.6 (C-3), 67.1 (C-5), 38.2 (C-6). HR-MS (ESI):  $m/z$  calculated for  $\text{C}_{20}\text{H}_{21}\text{O}_5\text{Br}$   $[\text{M}]^+ = 421.06451$  and  $423.06451$ , found =  $421.06448$  and  $423.06231$ .

## Synthesis of 6-chloro-1,3:2,4-dibenzylidene-D-sorbitol

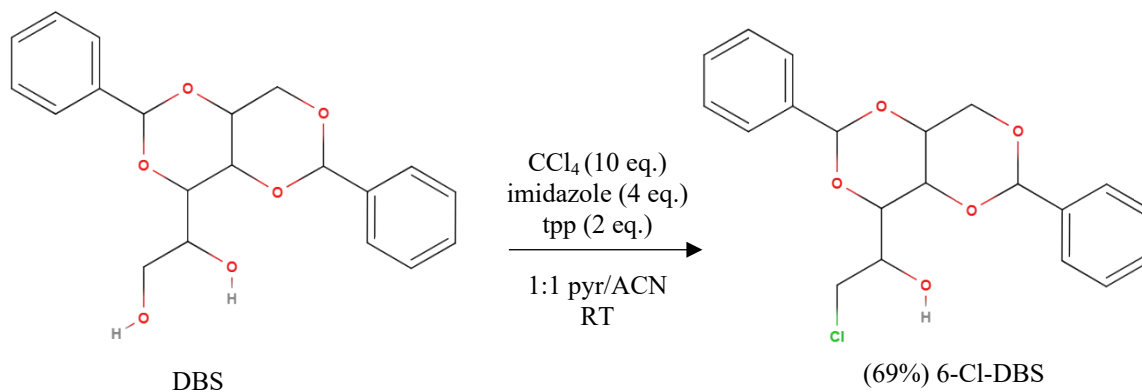

DBS (1g, 2.79 mmol) was added to a mixture of carbon tetrachloride (2.7 ml, 10 equiv), imidazole (763 mg, 4 equiv) and triphenylphosphine (1.5 g, 2 equiv) in 1:1 pyridine/acetonitrile (20 ml) at RT. The reaction mixture was sealed under a nitrogen atmosphere and stirred vigorously for 4-5 hr at RT. Progress of the reaction was followed by TLC (1:50 MeOH/DCM) and quenched by adding MeOH (250  $\mu$ l) and stirring for 10 min. The reaction mixture was diluted with toluene (6 x 50 ml), reduced to residue on a rotary evaporator and dried under vacuum. The residue, 6-bromo-1,3:2,4-dibenzylidene-D-sorbitol (6-Br-DBS), was passed through a silica column using (1:50 MeOH/DCM) to yield 724 mg (69%, 1.92 mmol) of 6-chloro-1,3:2,4-dibenzylidene-D-sorbitol (6-Cl-DBS).

$[\alpha]_D^{22} = +32.13$  (c 1.0, CH<sub>3</sub>CN). <sup>1</sup>H NMR (CD<sub>3</sub>OD, 400 MHz, 298 K) (Figure S9)  $\delta_H$ : 7.51-7.59 and 7.3-7.4 (2m, 4H and 6H, aromatics), 5.6 (d, 2H, 2CHPh), 4.4 (dd, 1H,  $J = 1.4, 12.6$  Hz, H-1a), 4.3 (m, 1H, H-5), 4.1 (m, 2H, H-1b, H-3), 3.9 (dd, 1H,  $J = 1.9, 8.6$  Hz, H-4), 3.8 (m, 3H, H-6a, H-6b, H-2), 2.3 (d, 1H, OH). <sup>13</sup>C NMR (CD<sub>3</sub>OD, 100 MHz, 298 K) (Figure S10)  $\delta_C$ : 137.9, 137.5, 129.16, 129.10, 128.26, 128.22, 126.46, 126.40 (aromatics), 100.9, 100.8 (2CHPh), 78.0 (C-4), 70.4 (C-2), 70.0 (C-1), 68.7 (C-3), 67.6 (C-5), 47.8 (C-6). HR-MS (ESI):  $m/z$  calculated for C<sub>20</sub>H<sub>21</sub>O<sub>5</sub>Cl [M]<sup>+</sup> = 377.11503, found = 377.11485.

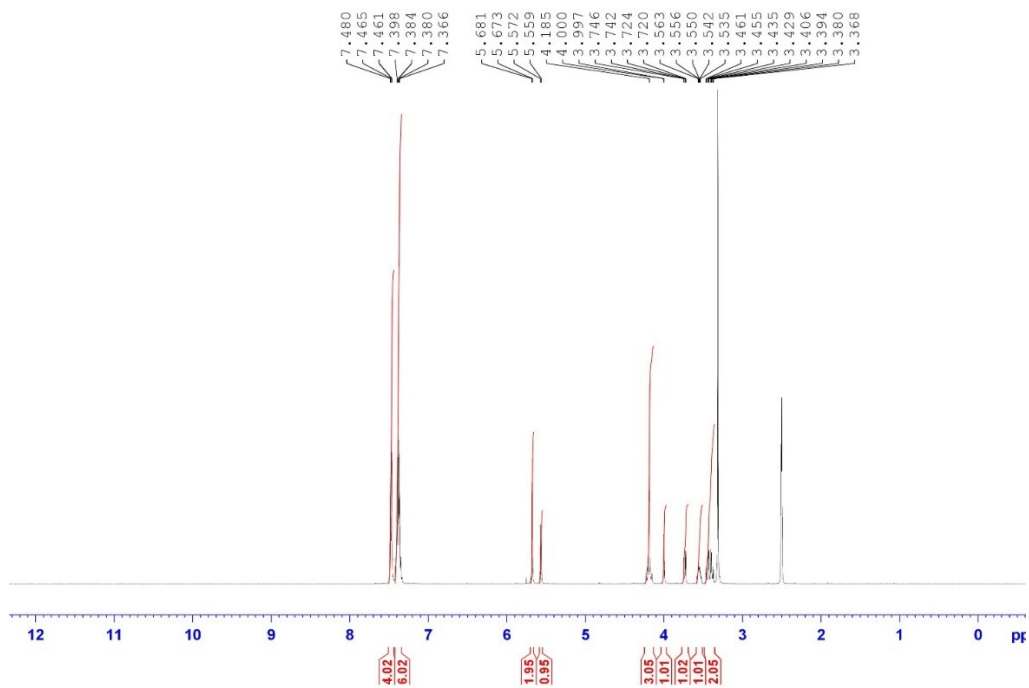

Figure S1:  $^1\text{H-NMR}$  of 1,3:2,4-dibenzylidene-6-iodo-D-sorbitol; 400MHz, 298 K,  $\text{CDCl}_3$ .

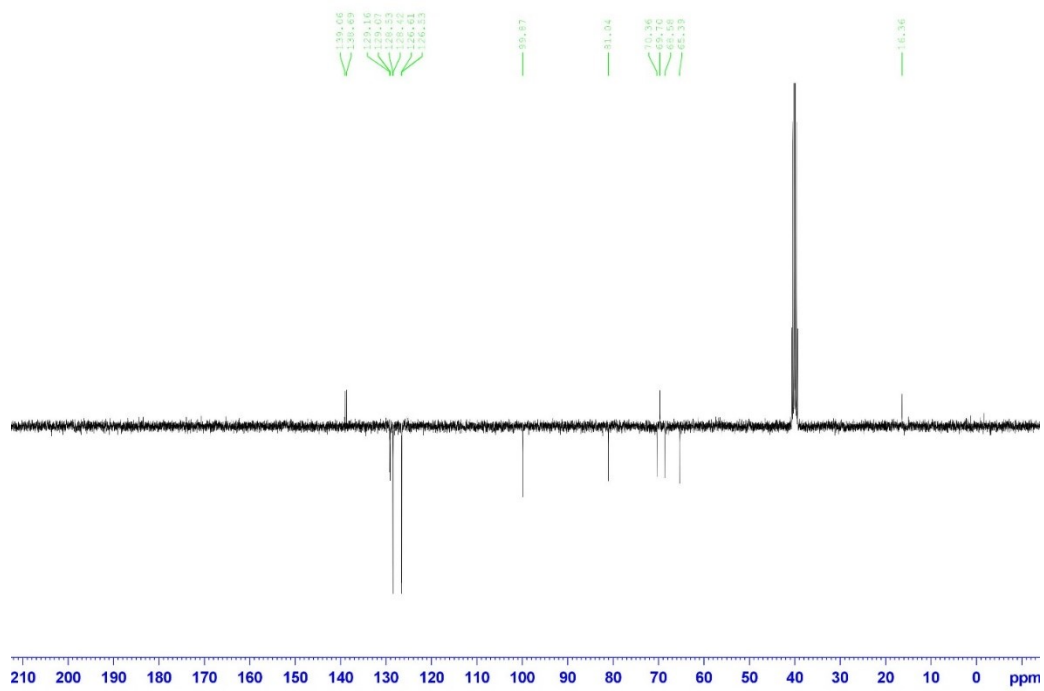

Figure S2:  $^{13}\text{C}$ -NMR of 1,3:2,4-dibenzylidene-6-iodo-D-sorbitol; 100MHz, 298 K,  $\text{CDCl}_3$ .

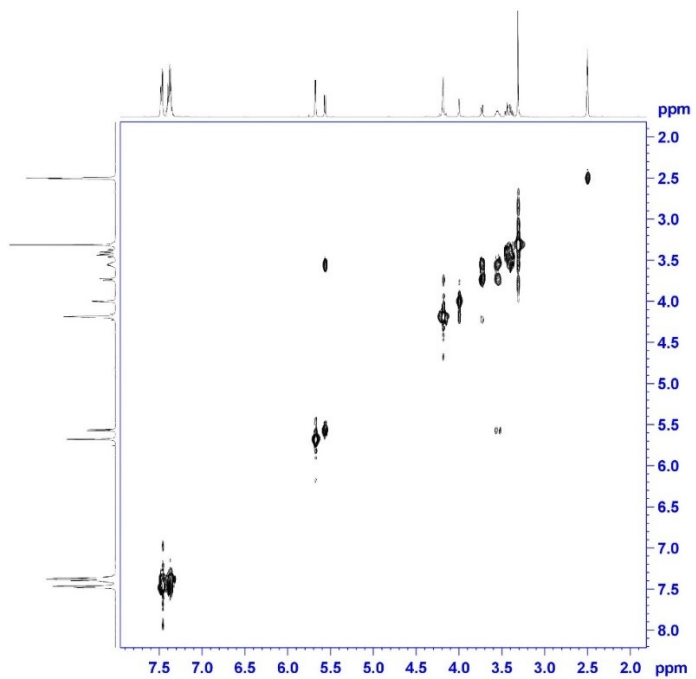

Figure S3: COSY of 1,3:2,4-dibenzylidene-6-iodo-D-sorbitol; 100MHz, 298 K, CDCl<sub>3</sub>.



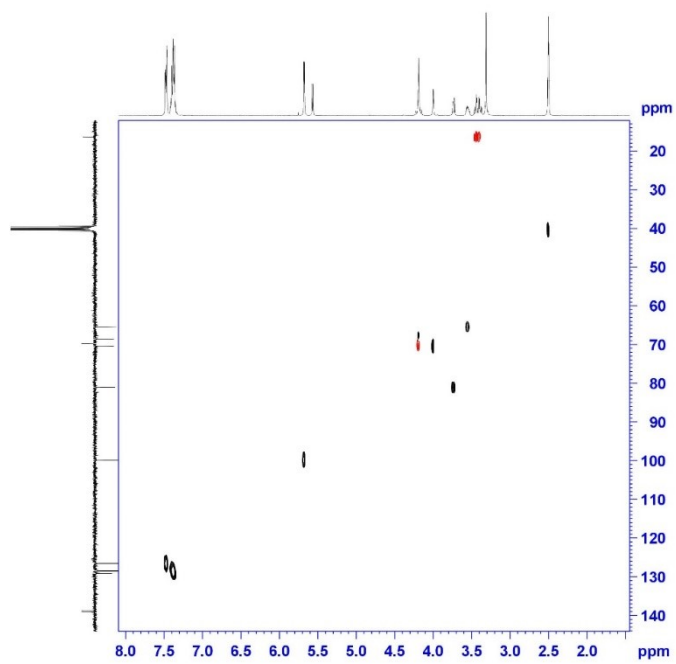

Figure S4: HSQC of 1,3:2,4-dibenzylidene-6-iodo-D-sorbitol; 100MHz, 298 K, CDCl<sub>3</sub>.

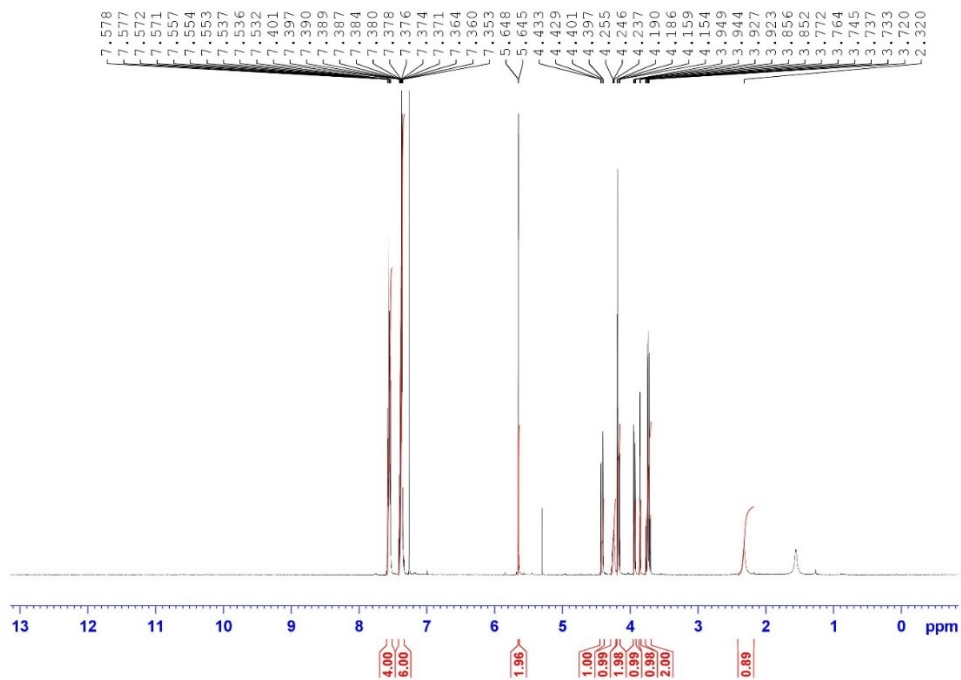

Figure S5:  $^1\text{H-NMR}$  of 6-bromo-1,3:2,4-dibenzylidene-D-sorbitol; 400MHz, 298 K,  $\text{CDCl}_3$ .

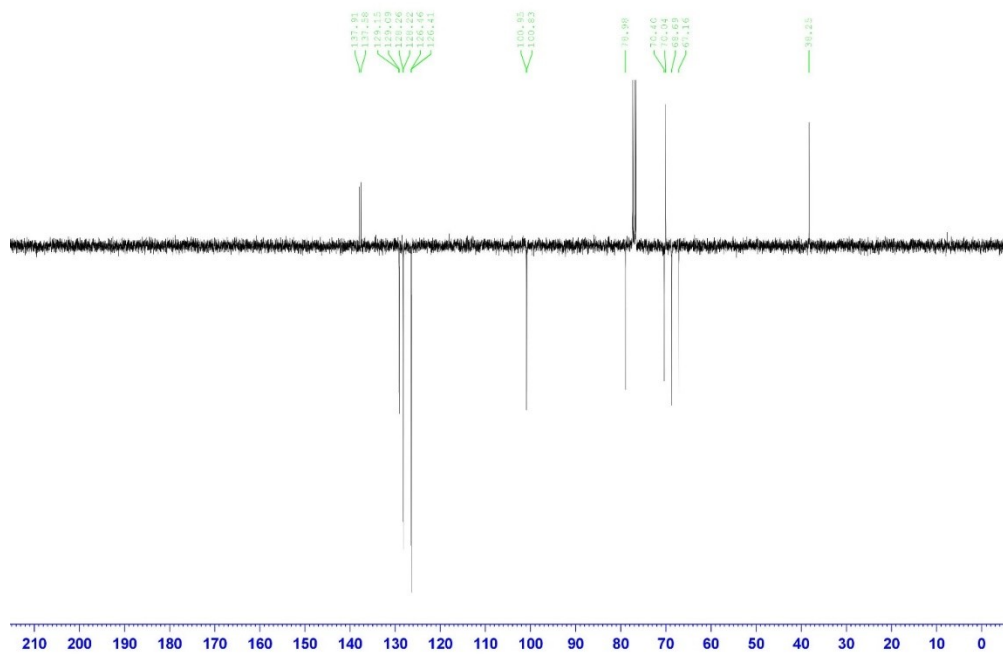

Figure S6: <sup>13</sup>C-NMR of 6-bromo-1,3:2,4-dibenzylidene-D-sorbitol; 100MHz, 298 K, CDCl<sub>3</sub>.

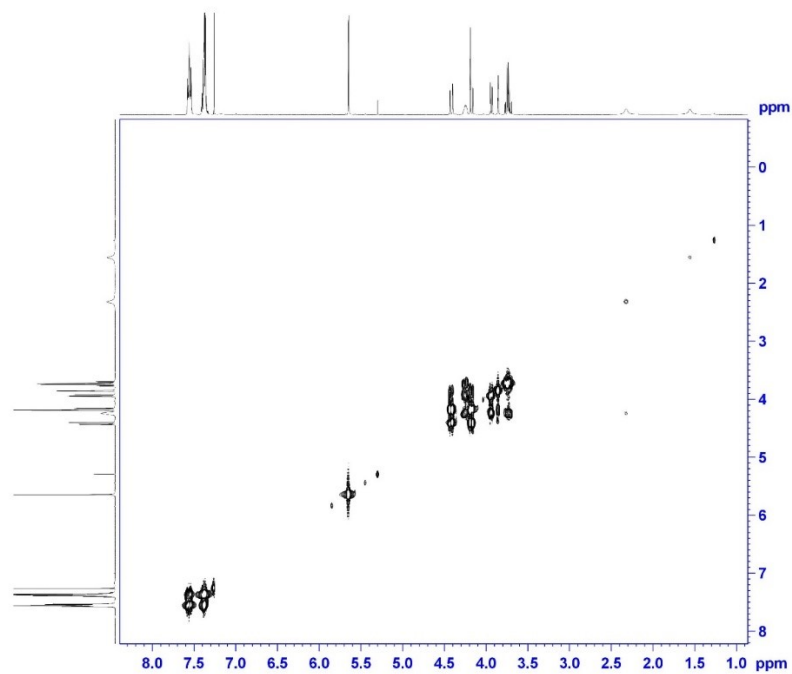

Figure S7: COSY of 6-bromo-1,3:2,4-dibenzylidene-D-sorbitol; 100MHz, 298 K,  $\text{CDCl}_3$ .

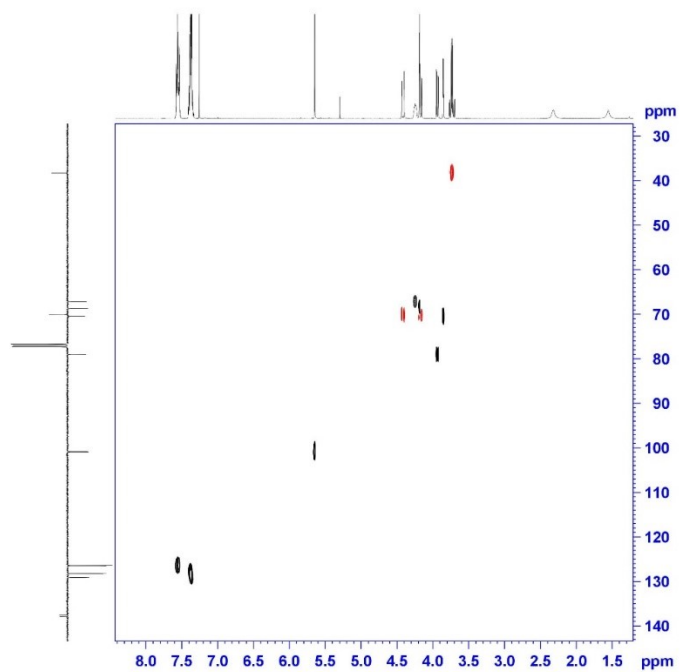

Figure S8: HSQC of 6-bromo-1,3:2,4-dibenzylidene-D-sorbitol; 100MHz, 298 K,  $\text{CDCl}_3$ .

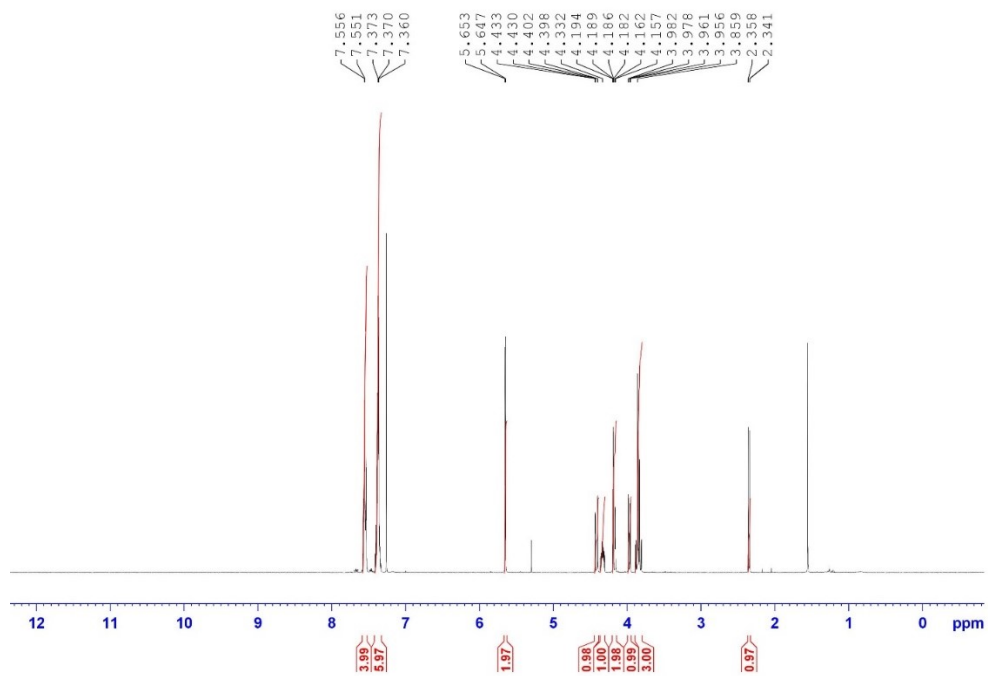

Figure S9:  $^1\text{H-NMR}$  of 6-chloro-1,3:2,4-dibenzylidene-D-sorbitol; 400MHz, 298 K,  $\text{CDCl}_3$ .

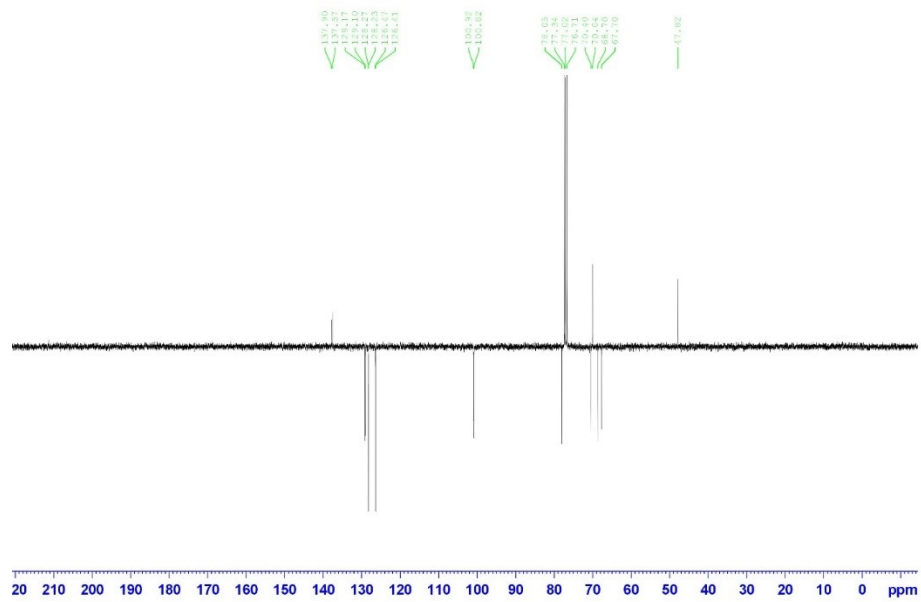

Figure S10:  $^{13}\text{C}$ -NMR of 6-chloro-1,3:2,4-dibenzylidene-D-sorbitol; 100MHz, 298 K,  $\text{CDCl}_3$ .

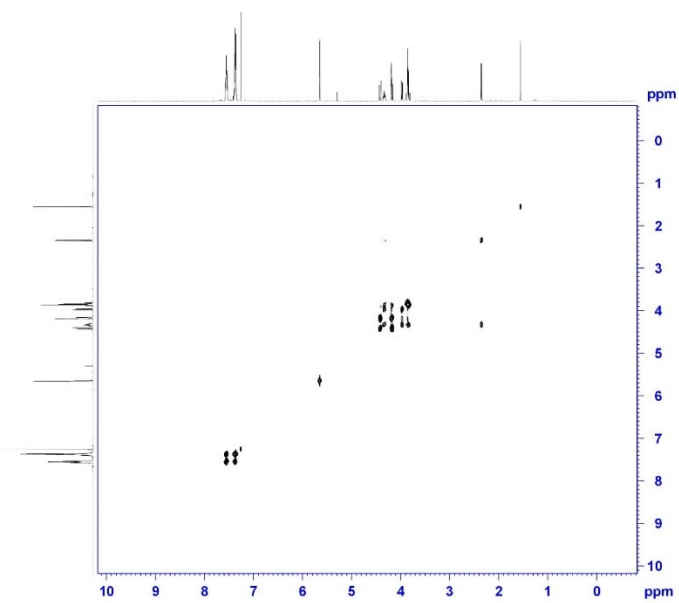

Figure S11: COSY of 6-chloro-1,3:2,4-dibenzylidene-D-sorbitol; 100MHz, 298 K,  $\text{CDCl}_3$ .



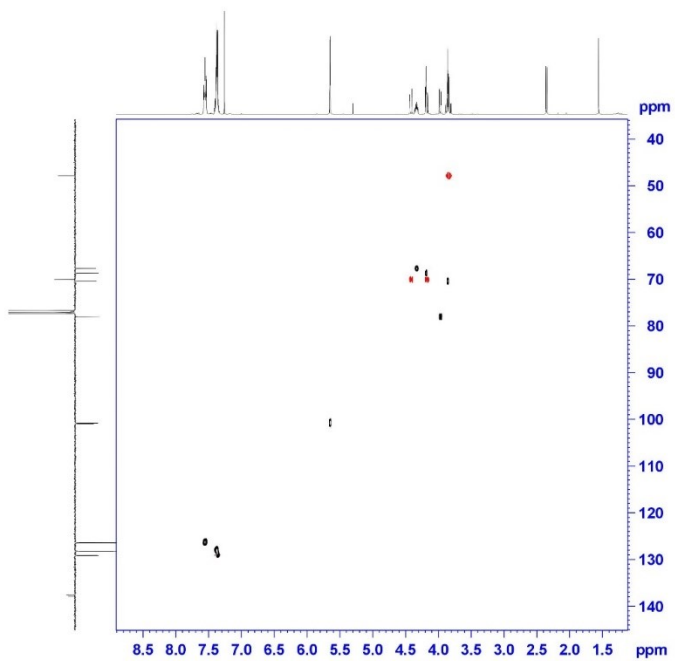

Figure S12: HSQC of 6-chloro-1,3:2,4-dibenzylidene-D-sorbitol; 100MHz, 298 K, CDCl<sub>3</sub>.
